# Supplementary material for: Endometrium as Control of Endometriosis in Experimental Research: Assessment of Sample Suitability
Source: MDPI journal article supplement (doi:10.3390/diagnostics12040970), 2022-04-12
Supplement: s1 [file s1]

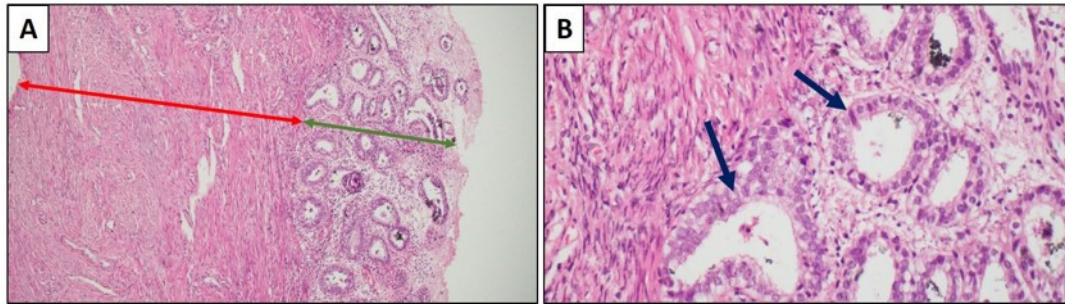

**Supplementary Figure S1.** Case 1 endometrium – H&E staining, 10× (A) and 40× (B) magnifications of 'Fresh' sample

*A: Beneath the secretory phase endometrium (green band) sample is composed of a relatively thick myometrium layer (red band)*

*B: Blue arrows show secretory phase endometrial glands.*

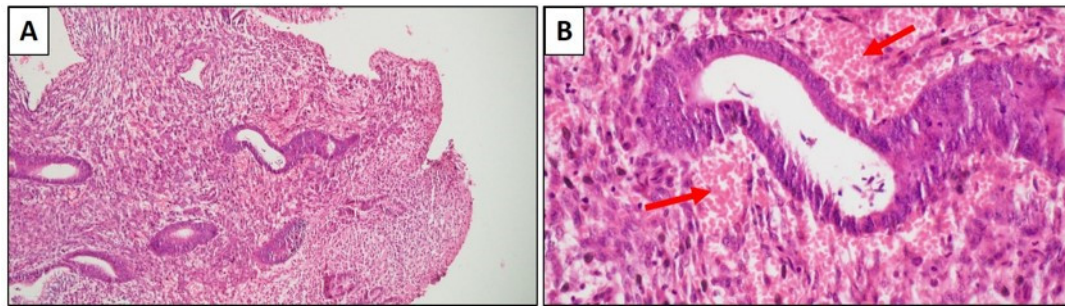

**Supplementary Figure S2.** Case 2 endometrium – H&E staining, 10× (A) and 40× (B) magnifications of 'Fresh' sample

*Red arrows show interstitial haemorrhage (artificial injury)*

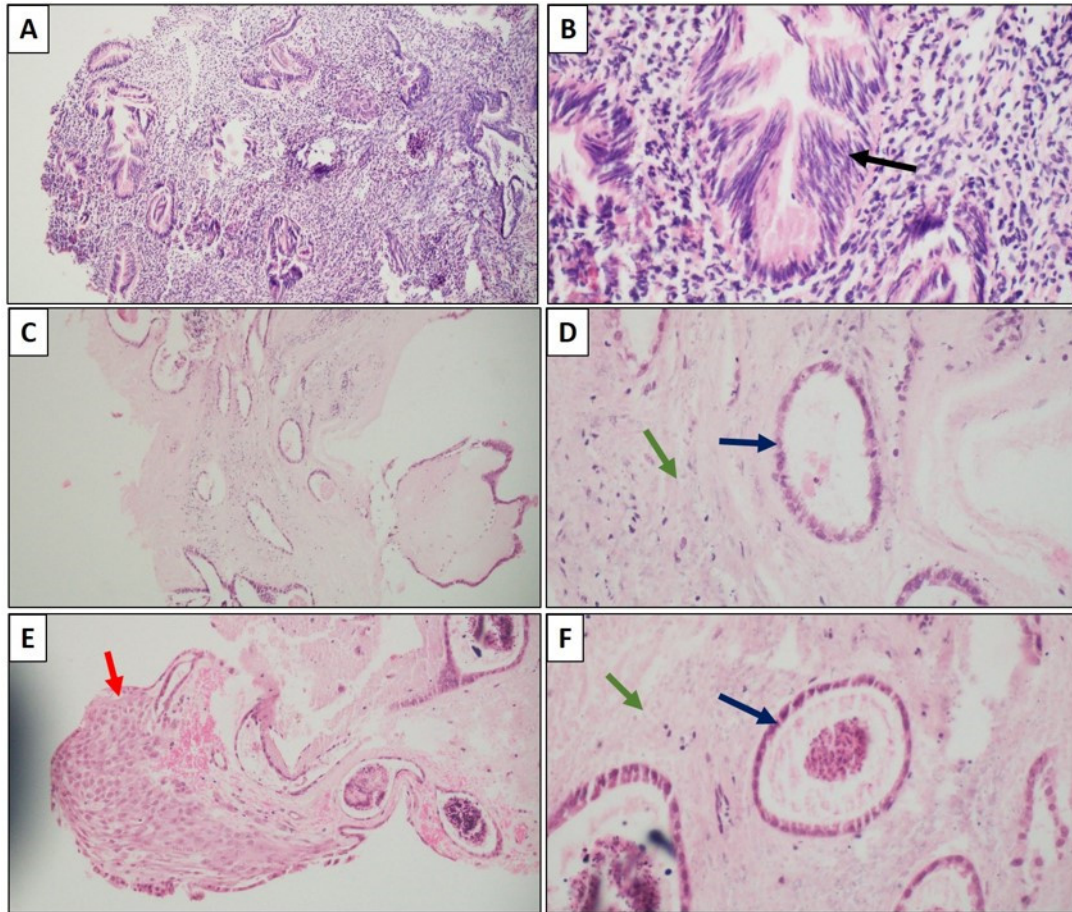

**Supplementary Figure S3.** Case 3 endometrium – H&E staining, 10 $\times$  (A, C), 20 $\times$  (E) and 40 $\times$  magnifications (B, D, F)

A & B: 'Fresh' sample, black arrow shows mechanical injury of endometrial glands (artificial injury)

C & D: Control cultured sample, green arrow shows stromal necrosis around endometrial glands (blue arrow)

E & F: Hormone treated and cultured sample, red arrow shows squamous cell metaplasia, stromal necrosis (green arrow) can be seen around endometrial glands (blue arrow)



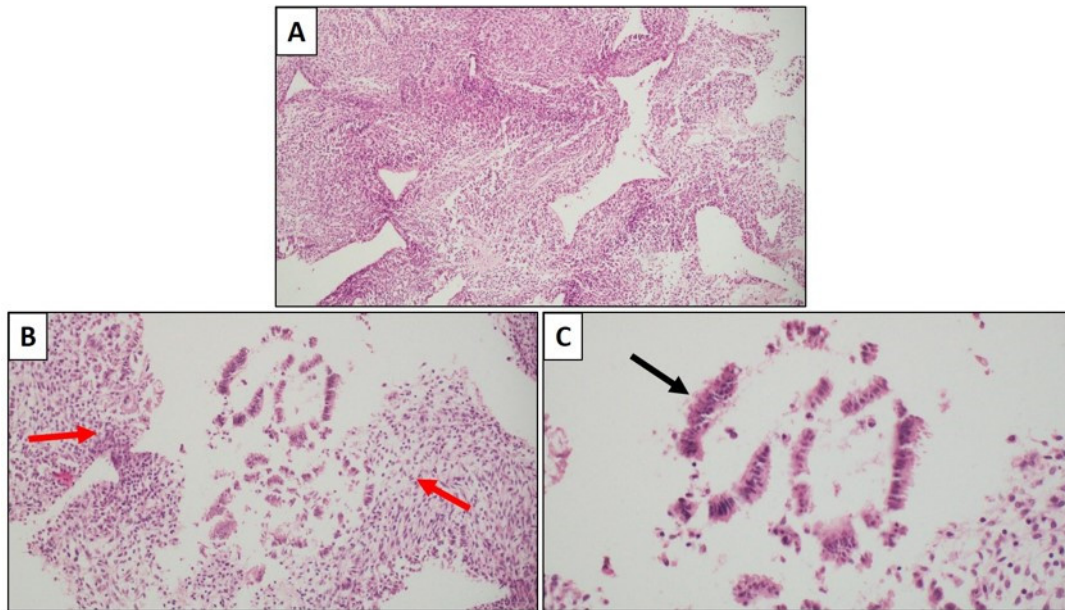

**Supplementary Figure S4.** Case 4 endometrium – H&E staining, 10× (A), 20× (B) and 40× (C) magnifications of ‘Fresh’ sample  
*Black arrow shows endometrial gland cells separated from the stroma (red arrows)*

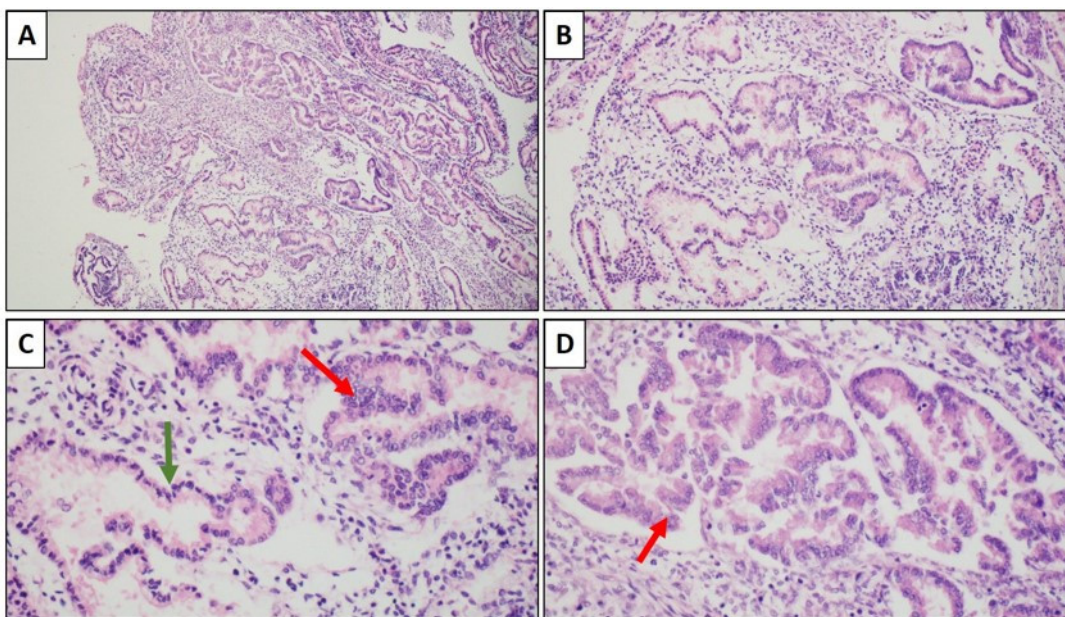

**Supplementary Figure S5.** Case 5 endometrium – H&E staining, 10× (A), 20× (B) and 40× (C, D) magnifications of ‘Fresh’ sample  
*Proliferative (green arrow) and secretory phase (red arrow) endometrial glands can be seen alongside each other*

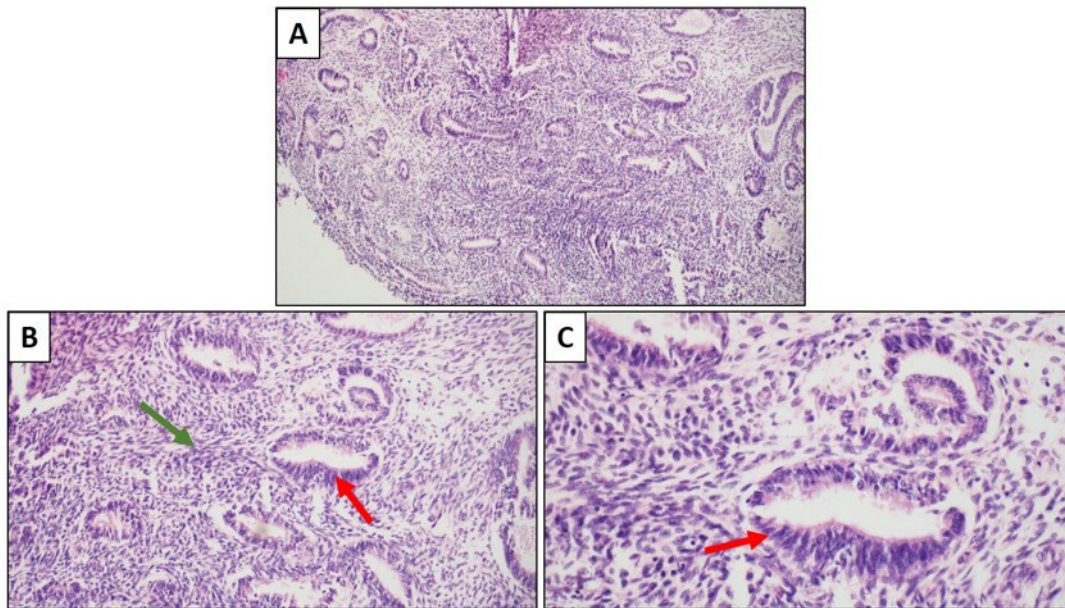

**Supplementary Figure S6.** Case 6 endometrium – H&E staining, 10 $\times$  (A), 20 $\times$  (B) and 40 $\times$  (C) magnifications of ‘Fresh’ sample  
 Secretory phase endometrial glands (red arrow) are embedded to the proliferative phase stroma (green arrow)

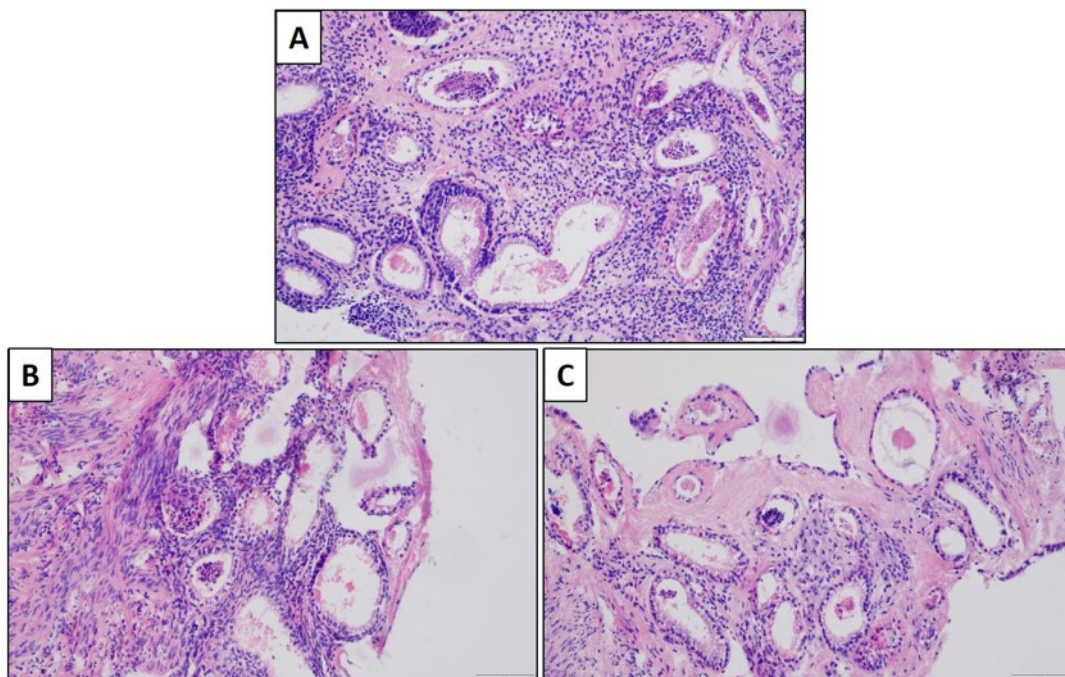

**Supplementary Figure S7.** Case 7 endometrium – H&E staining, 20 $\times$  magnifications  
 A: ‘Fresh’ sample, B: Control cultured sample, C: Hormone treated and cultured sample



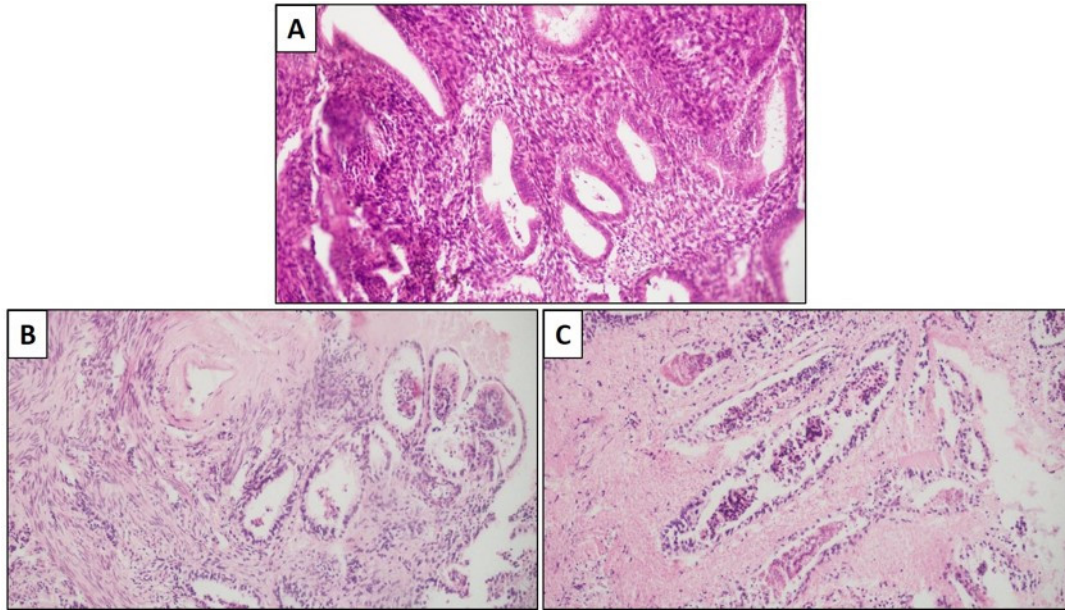

**Supplementary Figure S8.** Case 8 endometrium – H&E staining, 20 $\times$  magnifications  
*A: 'Fresh' sample, B: Control cultured sample, C: Hormone treated and cultured sample*
